# Supplementary material
Source: ML conference proceedings conference paper supplement (https://openreview.net/forum?id=wzmT6H1HlO)
Supplement: supplementary_material [file attachment]

# Supplementary Materials: Cloth-aware Augmentation for Cloth-generalized Person Re-identification

Anonymous Authors

## 1 EXPERIMENTS

**The Effects of Consisting Components.** We further assess the efficacy of Domain Augmentation and Feature Augmentation with AGW [3] and MGN [2] baselines, demonstrating that our module serves as an easily integratable enhancement for models, resulting in improved generalization ability. Our experiments are conducted using the LTCC dataset, and the results of the general setting are summarized in Table 1. It is evident that our strategy consistently enhances the overall generalization ability of other methods, seamlessly integrating into existing frameworks. Additionally, we perform experiments with CAL to showcase the performance of inner-sample and inter-sample exchanging in Table ??, demonstrating the positive impact of both strategies on generalization ability and robustness.

**The Augmentation Strategy Comparison.** As shown in Table 3, the results indicate that our strategy effectively mitigates the potential issue of augmenting data with poor quality. Moreover, our domain augmentation approach saves computational resources by utilizing a frozen model and serves as an efficient integration strategy for various augmentation techniques.

**Parameter Analysis.** We further investigate the parameter  $m$ , which governs the probability of exchanging elements in the feature augmentation strategy, as illustrated in Figure 1. The results demonstrate a significant improvement in performance once the feature augmentation strategy is applied to the Baseline. We determine that setting  $m=0.2$  yields optimal performance.

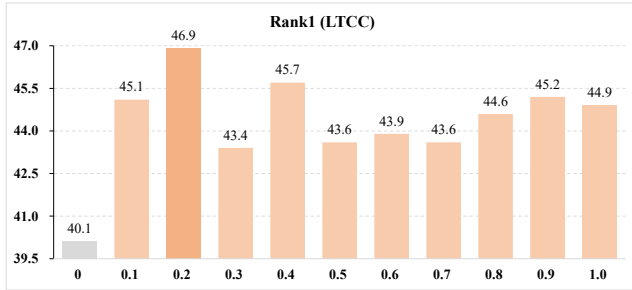

Figure 1: The parameter analysis for exchanging elements.

## REFERENCES

- [1] Terrance DeVries and Graham W Taylor. 2017. Improved regularization of convolutional neural networks with cutout. *arXiv* (2017).
- [2] Guanshuo Wang, Yufeng Yuan, Xiong Chen, Jiwei Li, and Xi Zhou. 2018. Learning Discriminative Features with Multiple Granularities for Person Re-Identification. In *ACMMM*. 274–282.
- [3] Mang Ye, Jianbing Shen, Gaojie Lin, Tao Xiang, Ling Shao, and Steven CH Hoi. 2021. Deep learning for person re-identification: A survey and outlook. *IEEE TPAMI* 44, 6 (2021), 2872–2893.
- [4] Sangdoo Yun, Dongyoon Han, Seong Joon Oh, Sanghyuk Chun, Junsuk Choe, and Youngjoon Yoo. 2019. Cutmix: Regularization strategy to train strong classifiers with localizable features. In *ICCV*. 6023–6032.

Table 1: Ablation studies on different components of our method in LTCC with the AGW and MGN Baseline.

| AGW | MGN | $\mathcal{L}_{D-Aug}$ | $\mathcal{L}_{F-Aug}$ | General |      |
|-----|-----|-----------------------|-----------------------|---------|------|
|     |     |                       |                       | Rank1   | mAP  |
| -   | ✓   | -                     | -                     | 68.4    | 34.6 |
| -   | ✓   | ✓                     | -                     | 71.2    | 34.8 |
| -   | ✓   | ✓                     | ✓                     | 71.8    | 35.7 |
| ✓   | -   | -                     | -                     | 71.8    | 34.9 |
| ✓   | -   | ✓                     | -                     | 74.5    | 36.6 |
| ✓   | -   | ✓                     | ✓                     | 75.4    | 37.1 |

Table 2: Ablation studies on Feature Augmentation in LTCC with the CAL Baseline.

| Inner-sample | Inter-sample | General |      | Cloth-changing |      |
|--------------|--------------|---------|------|----------------|------|
|              |              | Rank1   | mAP  | Rank1          | mAP  |
| -            | -            | 74.2    | 40.8 | 40.1           | 18.0 |
| -            | ✓            | 76.5    | 44.6 | 43.4           | 24.6 |
| ✓            | ✓            | 78.1    | 46.4 | 46.9           | 26.5 |

Table 3: The Comparison with Other Augmentation Strategies in LTCC with the AGW Baseline.

| Strategy             | General     |             |
|----------------------|-------------|-------------|
|                      | Rank1       | mAP         |
| Domain Augmentation  | 73.3        | 36.3        |
| Feature Augmentation | 74.7        | 36.5        |
| Mixed Augmentation   | <b>75.4</b> | <b>37.1</b> |
| CutOut [1]           | 72.6        | 34.7        |
| CutMix [4]           | 72.2        | 34.9        |
| Mixup [5]            | 72.4        | 34.7        |
| Erasing [6]          | 72.4        | 33.9        |

- [5] Hongyi Zhang, Moustapha Cisse, Yann N Dauphin, and David Lopez-Paz. 2017. mixup: Beyond empirical risk minimization. *arXiv p* (2017).
- [6] Zhun Zhong, Liang Zheng, Guoliang Kang, Shaozi Li, and Yi Yang. 2020. Random erasing data augmentation. In *AAAI*, Vol. 34. 13001–13008.
